# Supplementary material for: Prediction of Acquired Antimicrobial Resistance for Multiple Bacterial Species Using Neural Networks
Source: PubMed Central journal article supplement (PMC6977075; doi:10.1128/msystems.00774-19), 2020-01-21

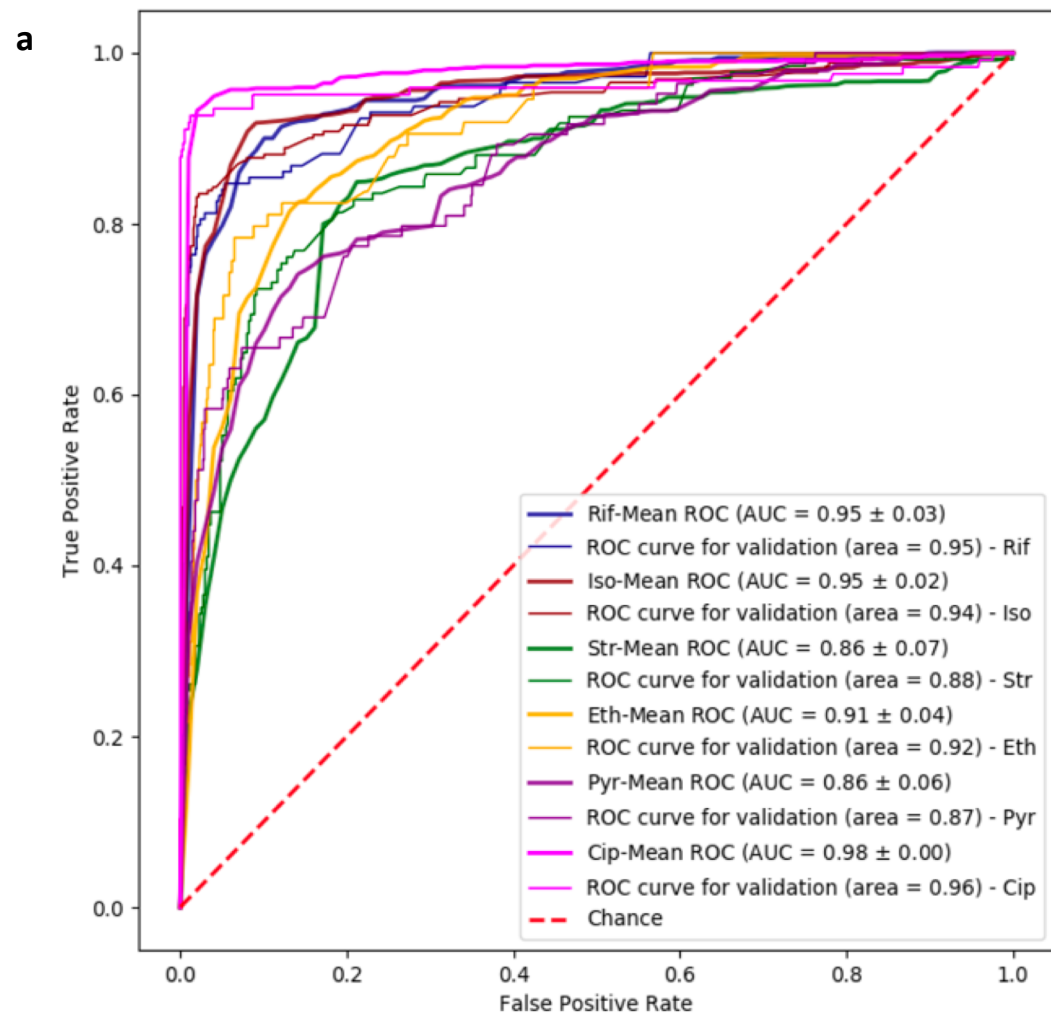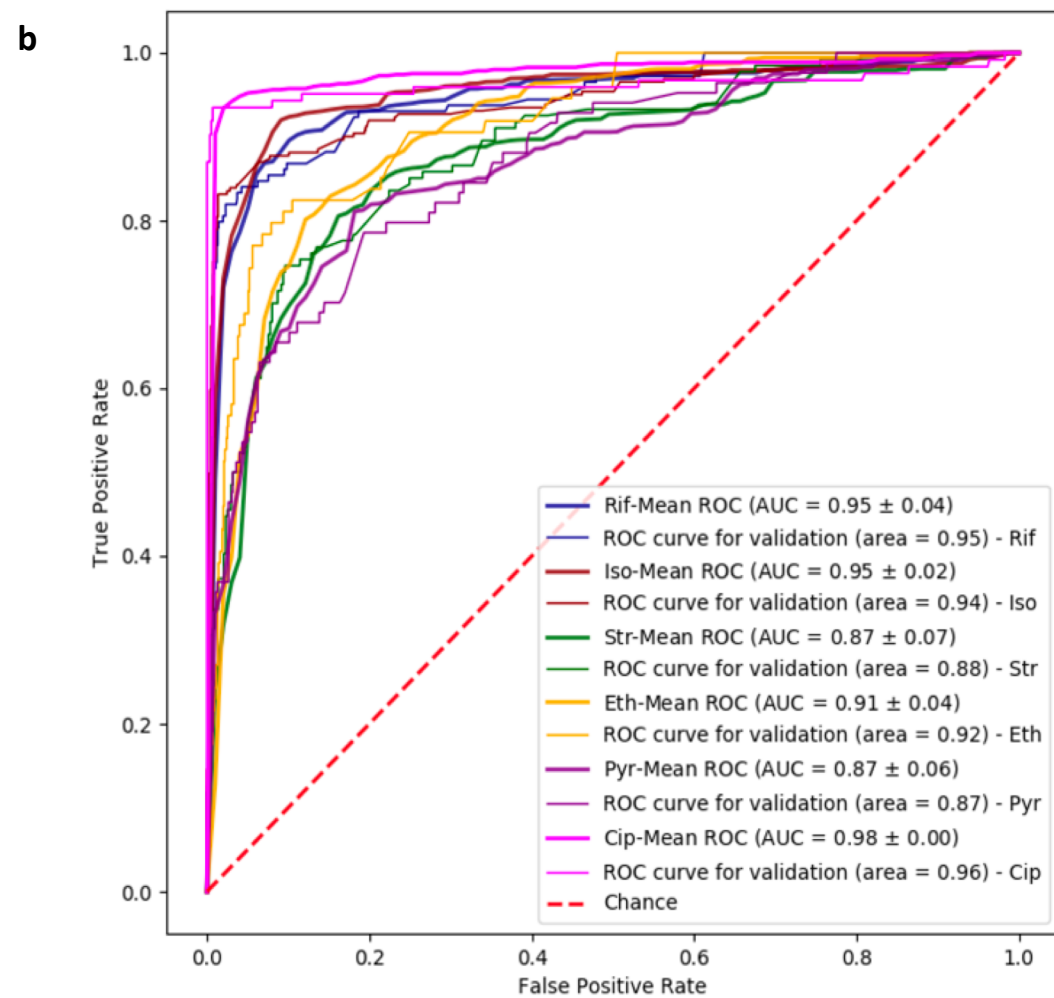

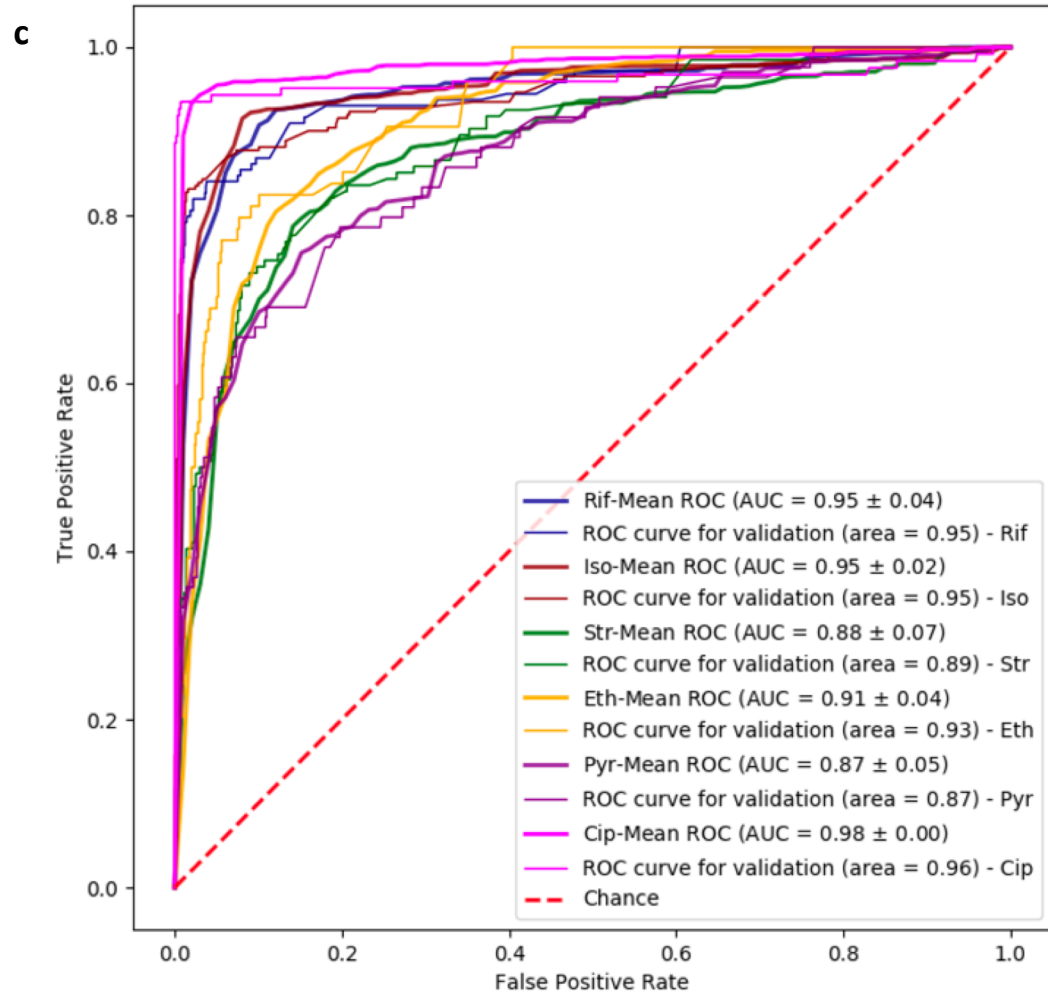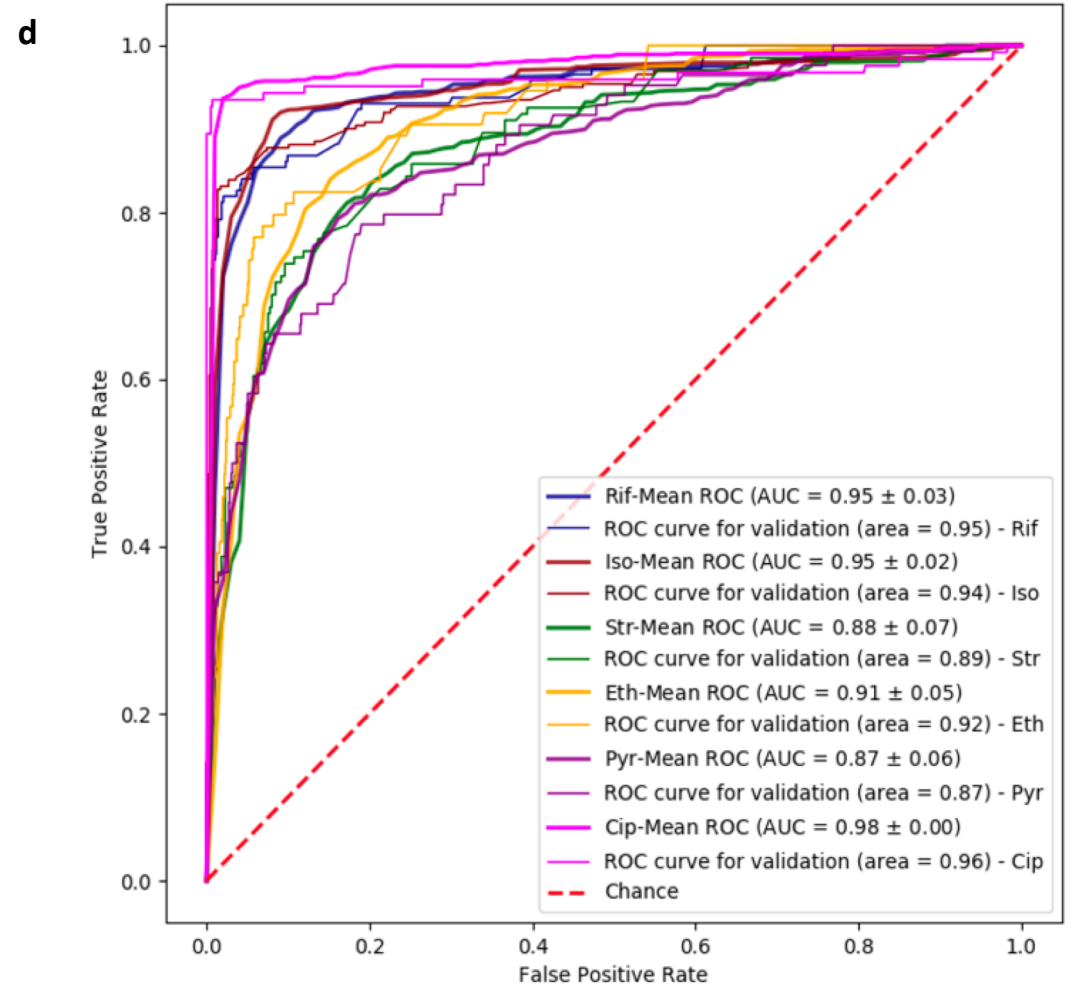

Supplement: mSystems.00774-19-sf001.pdf [file mSystems.00774-19-sf001.pdf]
